# Supplementary material
Source: PubMed Central journal article supplement (PMC7849395)

## Supplemental Figure Legends

**Fig. S1. Relative expression of SLC2 family members compared to matched normal breast tissues.** Volcano plots show the statistical significance of differences of relative expression of GLUT mRNA family members; GLUT8 mRNA is circled. Dashed lines show commonly used thresholds of statistical significance and fold change.

**Fig. S2. Base composition of GLUT8.** Base composition analysis of GLUT8 (NM\_014580.4) was performed using MacVector version 17.0.5. Mononucleotide base pairing shown in plot using a base window size of 50.

**Fig. S3. GLUT8 exon expression is similar across a large cancer panel.** The relative frequency of each exon (1-10) of GLUT8 is shown for 33 different types of tumor, scaled for total frequency of GLUT8 mRNA (partner to Fig. 4F).

**Fig. S4. Demonstration of specificity of new rabbit anti-GLUT8 antibody, BBA1.** Confocal microscopy of GLUT8 expression in MB231 cells. *Top Row:* parental MB231 cells (low endogenous expression of GLUT8) were transduced lentivirus expressing shRNA-GLUT8 (sh122 or 180; described in Fig. 4A) or scramble (scr) shRNA and stained with BBA1 antibody 48 hours later. *Middle, bottom rows:* MB231 cells stably expressing exogenous C-terminal FLAG GLUT8 were transduced with lentivirus expressing shRNA-GLUT8 or scramble shRNA and stained with BBA1. The sequence of CF-GLUT8 includes silent mutations that make it non-degradable by sh180. Scale bars show 10 $\mu$ M.

**Fig. S5. Lack of co-localization of GLUT8 with markers of early endosomes, peroxisomes and endoplasmic reticulum.** C-terminal FLAG GLUT8 protein was visualized in MB231 cells (using anti-FLAG), together with the early endosomal marker EEA1, peroxisomal marker PMP70 or endoplasmic reticulum maker PDI.

**Fig. S6. C-terminal FLAG v3 construct does not produce a FLAG tagged C-terminal peptide.** **A.** *Assay of mRNA expression.* qRT-PCR assay of RNA for MB231 cells expressing the constructs indicated. RT-qPCR assay was designed to be selective for v1 and v3 (as described for Fig.4C). **B.** *Assay of protein expression.* Western blot of lysates from the same cells showing that GLUT8-v3 constructs generate neither full-length nor detectable cleaved products. **C.** The protein and nucleotide sequences of the C-terminal and N-terminal FLAG sites of GLUT8.

**Fig. S7. Evaluation of fidelity of diffraction of red and green light (test of chromatic aberration).** C-terminal FLAG GLUT8 protein in MB231 cells was visualized after staining with primary anti-FLAG primary antibody and a mixture of anti-mouse secondary antibodies conjugated with Alexa<sup>488</sup> (green) or Alexa<sup>546</sup> (red).

**Fig. S8. Immunostaining of FLAG suggests masking of C-terminal FLAG epitope.** MB231 cells expressing either C-terminal or N-terminal FLAG tagged GLUT8 were stained with anti-FLAG, together with EEA1 (**A**) or PDI (**B**). Compare stain with the Western blotting data of Fig. 6A, which shows that N-FLAG and C-FLAG proteins are present in approximately equal amounts.

**Fig. S9. Increased GLUT8 does not protect TXNIP from degradation in starved cells re-fed amino acids.** MB231 cells expressing C-terminal-FLAG tagged GLUT8 were amino acid-starved overnight, and re-fed with single amino acids (I, isoleucine; L, leucine; V, valine) or all three (ILV) for 60 minutes (each added to final concentration of 0.8mM); cells were lysed, analyzed by Western blotting, and 15  $\mu$ gs of lysate probed with the antibodies indicated.

**Table S1. Evaluation of specificity of commercial antibodies to GLUT8.** BBA1 (in house rabbit polyclonal anti-peptide antibody) passed the quality control assays, defined as loss of signal after knockdown of GLUT8 and gain of signal upon over-expression. The following commercial antibodies were assayed by the same criteria and did not pass:

| <b>Antibody<br/>Cat#<br/>Source</b>                   | <b>Species<br/>Type</b> | <b>Epitope</b>                         | <b>Method tested<br/>Western blotting (WB)<br/>Immunofluorescent stain (IF)</b>                                                                                                                                                                  |
|-------------------------------------------------------|-------------------------|----------------------------------------|--------------------------------------------------------------------------------------------------------------------------------------------------------------------------------------------------------------------------------------------------|
| Anti-GLUT8<br>[EPR9477]<br>#Ab169779<br><b>Abcam</b>  | Rabbit<br>Monoclonal    | Not disclosed                          | WB: 42kDa band is prominent.<br>Failed to show knockdown by shRNA<br>IF: ND                                                                                                                                                                      |
| Anti-GLUT8 C-terminus<br>#07-1407<br><b>Millipore</b> | Rabbit<br>Polyclonal    | 11 amino acids near the C-terminus     | WB: Not compatible<br>IF: Nuclear staining pattern, not decreased by shRNA expression                                                                                                                                                            |
| Anti-GLUT8<br>#bs-4241R<br><b>Bioss</b>               | Rabbit<br>Polyclonal    | Immunogen:<br>AAs 278-292              | WB: 52, 45, 25kDa bands are prominent. Failed to show knockdown by shRNA.<br>Does not detect overexpression of FLAG tagged GLUT8.<br>IF: Nuclear staining pattern, not sensitive to shRNA expression.<br>No change in signal with overexpression |
| Anti-GLUT8<br>#Ab99132<br><b>Abcam</b>                | Rabbi<br>Polyclonal     | Peptide derived from range AAs 323-372 | WB: 70kDa band is prominent. Not sensitive to KD by shRNA. Does not detect overexpression of FLAG tagged GLUT8<br>IF: ND                                                                                                                         |
| Anti-GLUT8<br>#Ab191269,<br><b>Abcam</b>              | Rabbit<br>Polyclonal    | Synthetic peptide: Amino Acids 461-477 | WB: Does not detect overexpressed FLAG tagged GLUT8 or endogenous band<br>IF: ND                                                                                                                                                                 |

## Supplemental Methods

### *Primer sequences for qPCR*

| Gene name          | Primer sequence (5'-3')          |                                  | NCBI Ref Seq Id         |
|--------------------|----------------------------------|----------------------------------|-------------------------|
|                    | Forward                          | Reverse                          |                         |
| HPRT               | CCTCATGGACTGATTATGGACAG          | AATCCAGCAGGTCAGCAAAG             | NM_000194               |
| YWHAZ              | AAG ACA GCA CGC TAA TAA<br>TGC   | TTG GAA GGC CGG TTA ATT<br>TTC   | NM_003406               |
| GLUT1              | TTG CAG GCT TCT CCA ACT<br>GGA C | ACG AAC CAG GAG CAC AGT<br>GAA G | NM_006516               |
| GLUT8<br>all       | ACG AAC CAG GAG CAC AGT<br>GAA G | GAT CTC TGA CAT GAG GAG<br>CCA G | NM_014580, NM_001271712 |
| GLUT8<br>variant 1 | GTT CGG GGC TGT CGT GAC          | AGC ATC CAC ACG TCC TGG          | NM_014580, NM_001271711 |
| GLUT8<br>variant 3 | TGG CGG CAG GTC TAC AT           | TGC CGA CGA CGA CCA TTA          | NM_001271712            |

Fig. S1

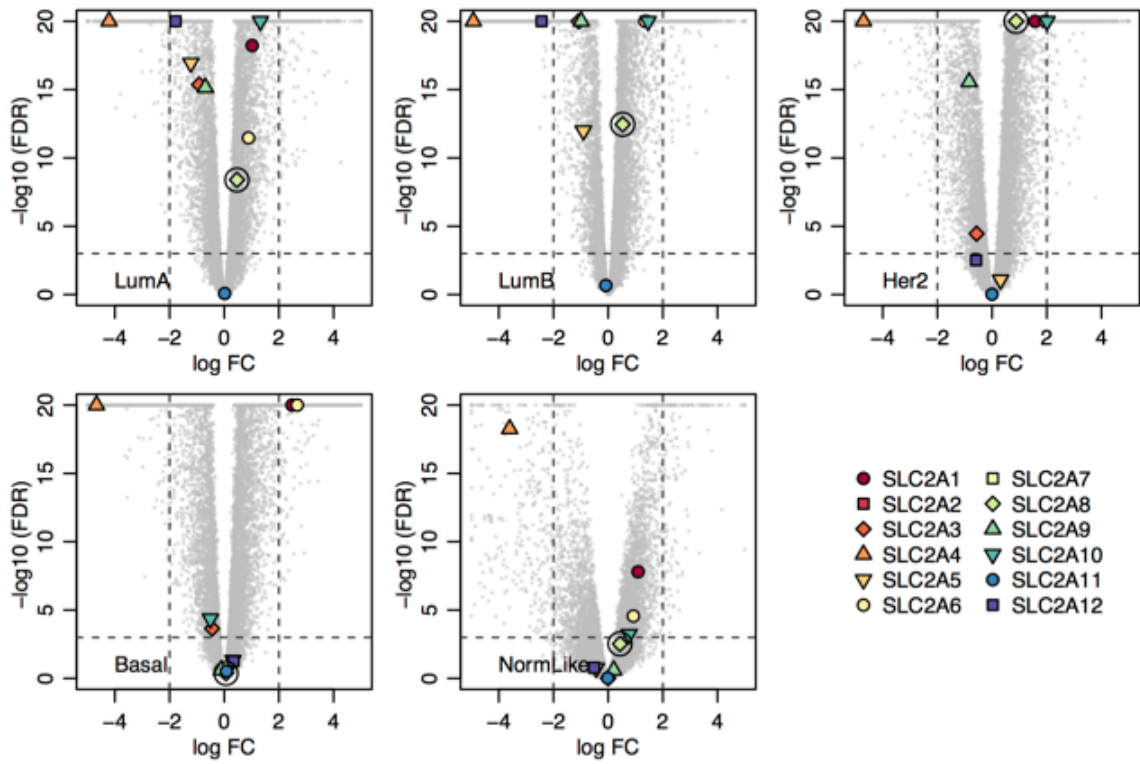

Fig. S2

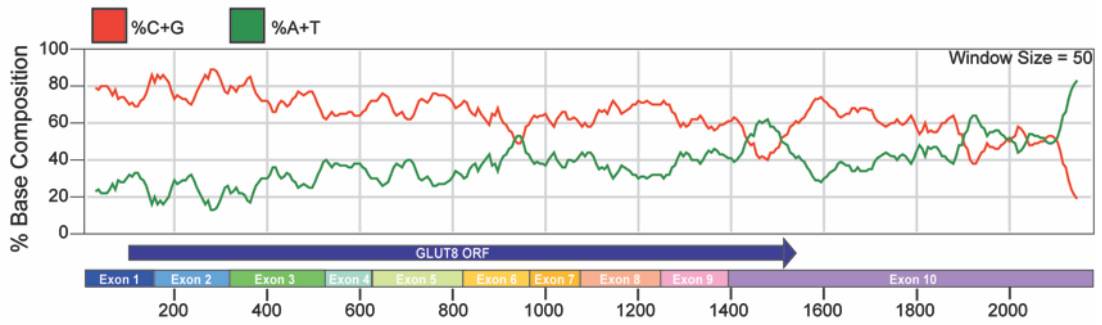

Fig. S3

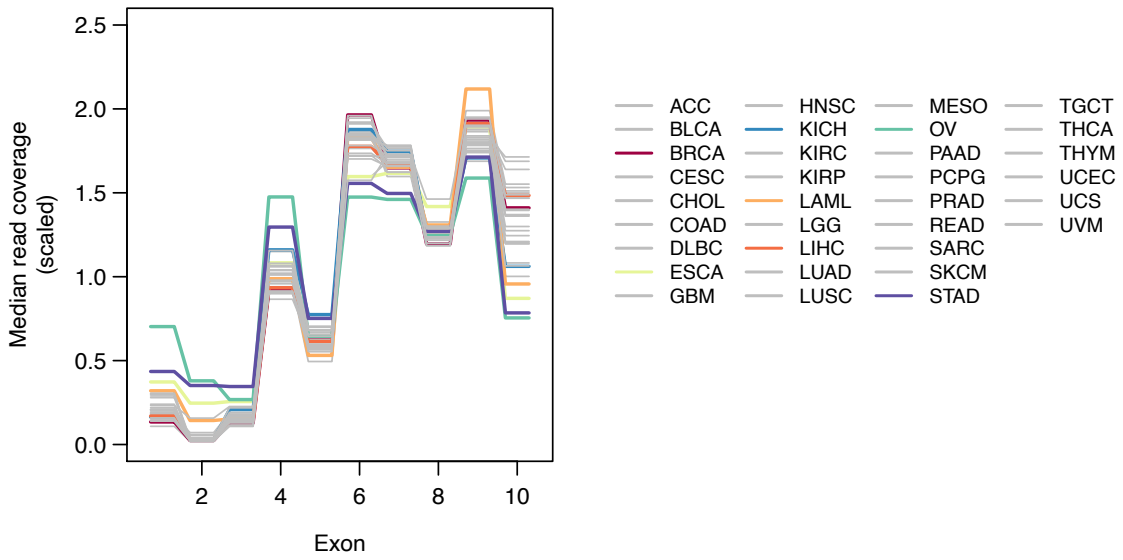

Fig. S4

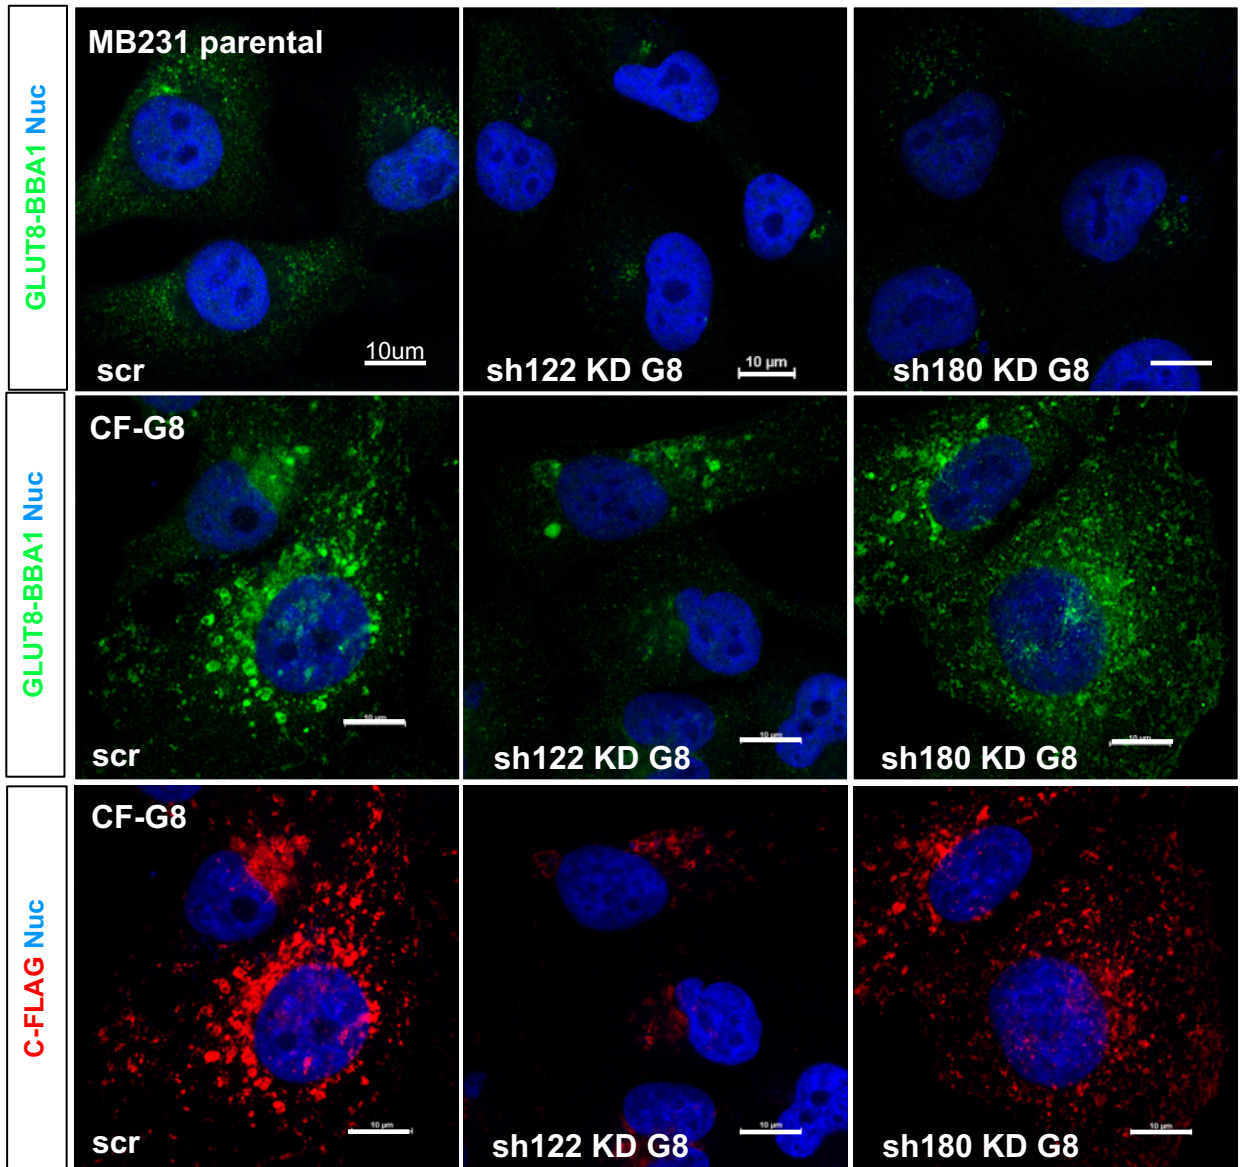

Fig. S5

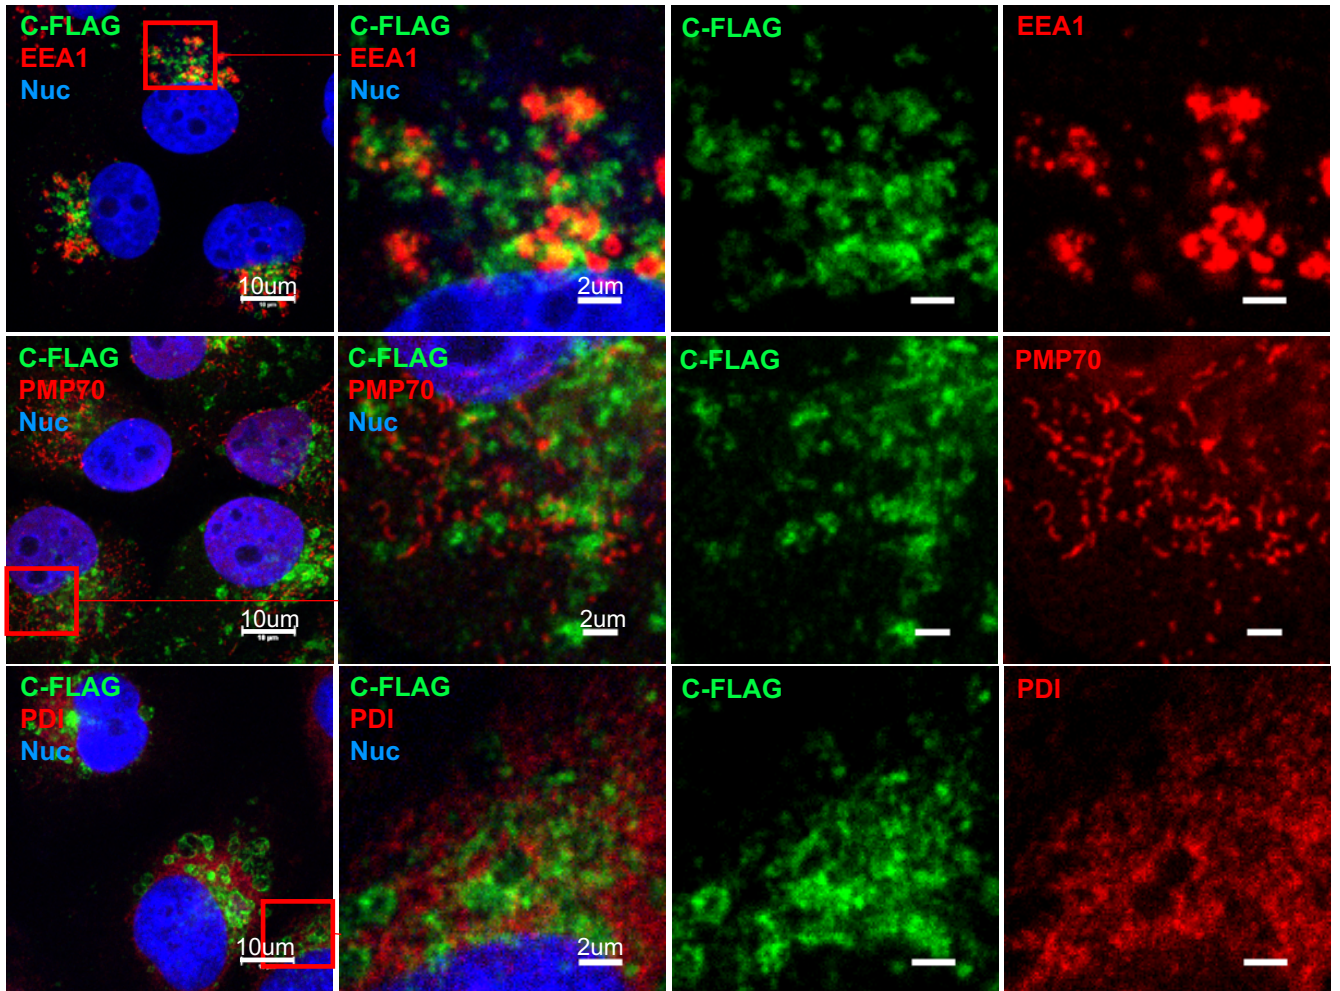



Fig. S6

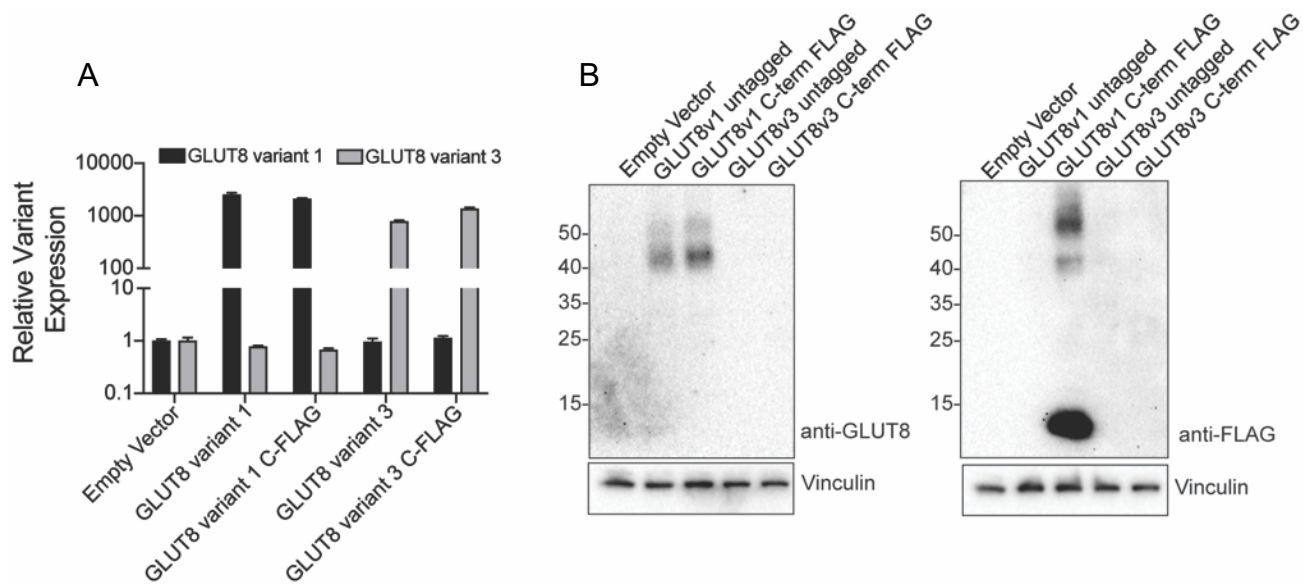

Fig. S7

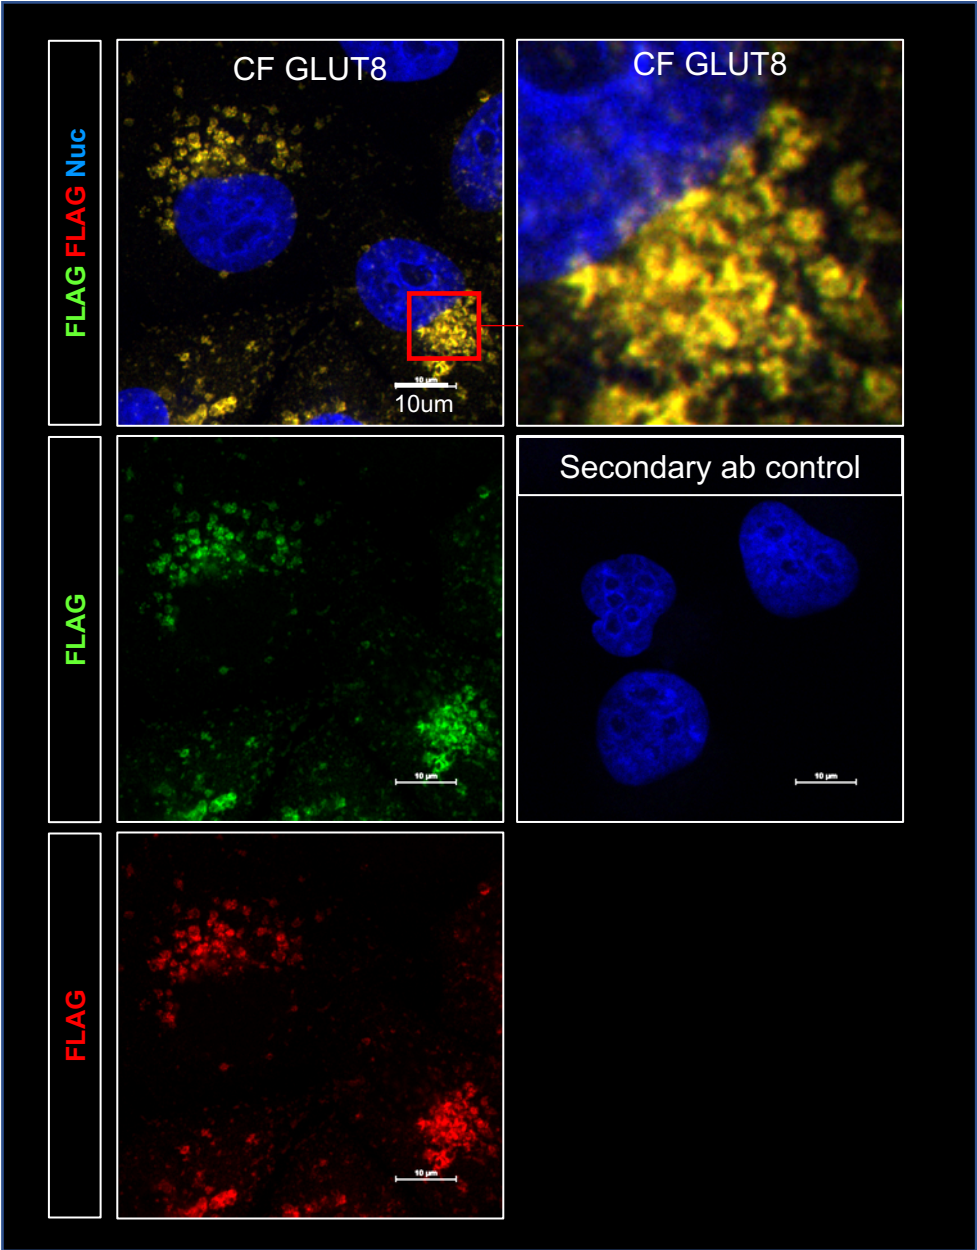

Fig. S8

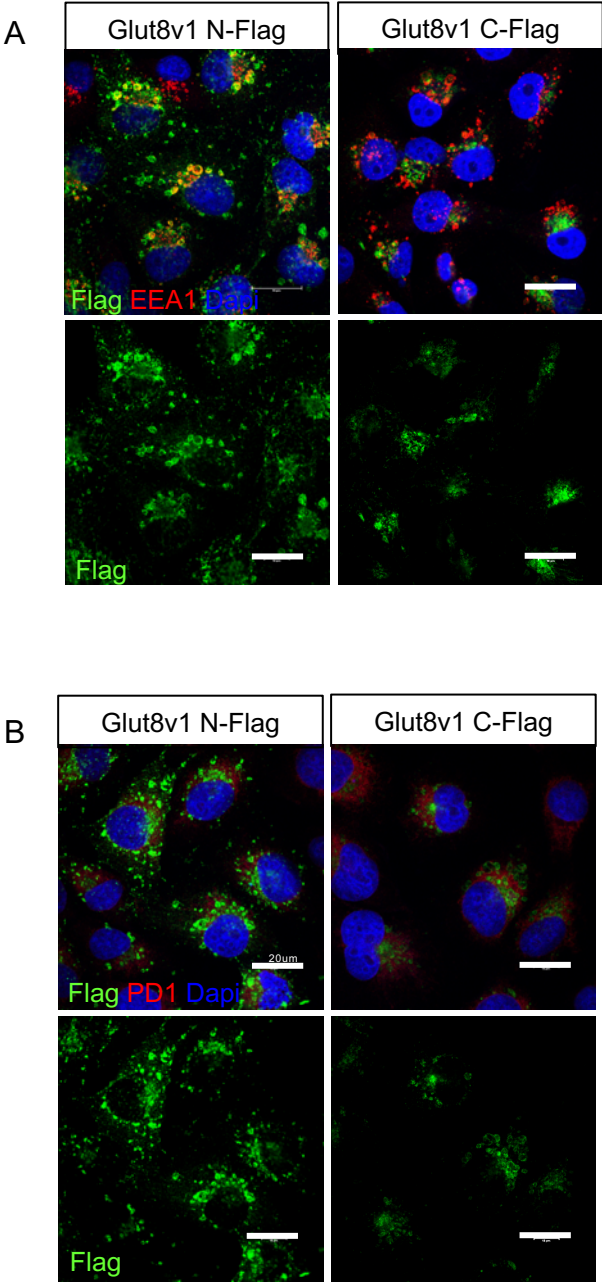

Supplement: MCB.00480-20-s0001.pdf [file MCB.00480-20-s0001.pdf]
